# Supplementary material for: Chip-based array magnetic solid phase microextraction on-line coupled with inductively coupled plasma mass spectrometry for the determination of trace heavy metals in cells
Source: Royal Society of Chemistry journal article supplement (doi:10.1039/c5an00736d), 2015-01-01
Supplement: c5an00736d1.pdf [file c5an00736d1.pdf]

**1 Chip-based array magnetic solid phase microextraction on-**  
**2 line coupled with inductively coupled plasma mass**  
**3 spectrometry for the determination of trace heavy metals in**  
**4 cells**

**5** Han Wang, Zhekuan Wu, Beibei Chen, Man He, Bin Hu\*  
**6** Key Laboratory of Analytical Chemistry for Biology and Medicine (Ministry of Education),  
**7** Department of Chemistry, Wuhan University, Wuhan 430072, China

**8 Supplementary materials**

**9**

**10 Abbreviations**

|        |                                              |
|--------|----------------------------------------------|
| MNPs   | magnetic nanoparticles                       |
| APTES  | (3-aminopropyl) triethoxysilane              |
| TEOS   | tetraethoxysilane                            |
| PDMS   | polydimethylsilicone                         |
| FBS    | fetal bovine serum                           |
| PBS    | phosphate buffer solution                    |
| FT-IR  | fourier transform infrared spectroscopy      |
| XPS    | X-ray photo electron spectroscopy            |
| TEM    | transmission electron microscope             |
| ICP-MS | inductively coupled plasma mass spectrometry |

**11**

**12 Preparation of Fe<sub>3</sub>O<sub>4</sub>@SiO<sub>2</sub>@APTES MNPs**

**13** The Fe<sub>3</sub>O<sub>4</sub> MNPs were prepared through a solvothermal reaction. Briefly, 11.68 g  
**14** FeCl<sub>3</sub>·6H<sub>2</sub>O and 4.30 g FeCl<sub>2</sub>·4H<sub>2</sub>O were dissolved in 200 mL high purity deionized  
**15** water with nitrogen gas protection and vigorously stirring at 85° C. Then 40 mL 30%  
**16** (v/v) NH<sub>3</sub>·H<sub>2</sub>O was added to generate Fe<sub>3</sub>O<sub>4</sub> MNPs which were subsequently washed

17 and stored in high purity deionized water. Afterwards, 4.0 g of prepared  $\text{Fe}_3\text{O}_4$  MNPs  
18 were dispersed in the mixture of isopropanol (100 mL), deionized water (12 mL) and  
19 concentrated ammonia aqueous solution (7 mL), followed by the addition of 8 mL  
20 TEOS. After stirring at room temperature for 12 h, the  $\text{Fe}_3\text{O}_4@\text{SiO}_2$  MNPs were then  
21 washed with high purity deionized water and ethanol. And then 4.0 g of prepared  
22  $\text{Fe}_3\text{O}_4@\text{SiO}_2$  MNPs were dispersed in the mixture of ethanol (200 mL), glycerol (100  
23 mL), deionized water (5 mL), followed by the addition of 5 mL APTES. After stirring  
24 at 85° C with nitrogen gas protection for 3 h, the  $\text{Fe}_3\text{O}_4@\text{SiO}_2@\text{APTES}$  MNPs were  
25 washed with high purity deionized water and ethanol.

26

## 27 **Fabrication of PDMS microfluidic devices**

28 Soft lithography and rapid prototyping with PDMS technology are employed for  
29 fabrication of microfluidic devices. A transparent mask patterned with a high  
30 resolution laser printer was used to make a master on a silicon wafer with AZ 50XT  
31 photoresist. Before PDMS casting, the master was exposed to trimethylchlorosilane  
32 vapor for 3 min to avoid the adhesion between PDMS and silicon wafer. For the  
33 preparation of the upper thick layer (flow channels), GE RTV 615 (PDMS)  
34 component A and B were mixed at a ratio of 10:1 and cast on the master after air  
35 bubbles disappeared. Then permanent magnets were placed parallel on both sides of  
36 the central channels. After incubated at 75° C for 3 h, the solidified PDMS was peeled  
37 off and drilled on demand. For the preparation of the lower thin layer (controlling  
38 channels), GE RTV 615 (PDMS) component A and B were mixed at a ratio of 15:1.  
39 After air bubbles disappeared, the mixture was spin-coated onto the master (~ 50  $\mu\text{m}$   
40 thick) and then incubated at 75°C for 30 min. Afterwards, these two layers were  
41 treated with oxygen plasma, and the upper layer was aligned onto the lower layer and  
42 bonded at 75°C for 30 min. After the ensemble was peeled off and the holes for valves  
43 were frilled, the ensemble and a clean glass were exposed to oxygen plasma and then

44 bonded together. And the schematic layout of the fabricated chip layer by layer was  
45 shown in Fig. S6.

#### 46 **Preparation of magnetic solid phase packed-column on the chip**

47 25 mg  $\text{Fe}_3\text{O}_4@\text{SiO}_2@\text{APTES}$  MNPs were dispersed in 1 mL high purity deionized  
48 water containing  $1\text{gL}^{-1}$  CTAB to avoid aggregation<sup>25</sup>. The mixture was sonicated for  
49 15 min to disperse homogeneously. Then the dispersion was introduced into the  
50 channel from inlet of A1-A5 (Fig.1) at a flow rate of  $4\text{ mL min}^{-1}$  for 5 min with B2-  
51 B8 being switched off by the controlling microvalves. When reaching the magnetic  
52 zone, the  $\text{Fe}_3\text{O}_4@\text{SiO}_2@\text{APTES}$  MNPs self-assembled into a solid phase packed-  
53 column in the microfluidic channel under the magnetic field. As can be seen in Fig.  
54 1(c), the  $\text{Fe}_3\text{O}_4@\text{SiO}_2@\text{APTES}$  MNPs were steadily trapped in the channels observed  
55 under the microscope. Then the flow rate was decreased to  $1\text{ mL min}^{-1}$  for 5 min to  
56 consolidate the column. After that, the self-assembled magnetic solid phase packed-  
57 column on the chip was dried at room temperature prior to further experiments.

58

#### 59 **Sample preparation**

60 HepG2, Jurkat T and MCF7 cells were maintained in a humidified incubator  
61 containing 5%  $\text{CO}_2$  and 95% air at  $37\text{ }^\circ\text{C}$ . HepG2 and MCF7 cells were incubated in  
62 DMEM medium, supplemented with 10% FBS and Jurkat T cells were incubated in  
63 RPMI-1640 medium, supplemented with 10% FBS.

64 After centrifugation (1500 rpm, 5 min), the supernatant was removed and the cells  
65 were washed with PBS twice. Then the amount of cells was counted, and the density  
66 of cells solution were diluted to 120,000 HepG2 cells, 600,000 Jurkat T cells and  
67 160,000 MCF7 cells per millilitre (in PBS), respectively. Each 0.5 mL of cell  
68 dispersion solution was subjected to ultrasonication for 30 min, and then introduced  
69 into microextraction channel on chip directly.

70 To investigate the extractable species of target metal in the proposed system, only  
71 HepG2 cell was used. The density of cell lysis samples is  $2\times 10^6$  per millilitre, and 30

72  $\mu\text{L}$  sample was injected into the SEC column after filtration. The target metal ions  
73 prepared in eluent solution involved a mixed standard solution (10, 30, 0.5, 0.5, 0.5  
74 and 0.5  $\text{ng mL}^{-1}$  for Cu, Zn, Cd, Pb and Bi, respectively) in 0.5  $\text{mol L}^{-1}$   $\text{HNO}_3$   
75 containing 2% thiourea and 30  $\mu\text{L}$  was injected into the SEC/RP-HPLC column after  
76 filtration.

77 As a comparison, the cell samples were also analyzed by conventional ICP-MS with  
78 acid digestion. After centrifugation (1500 rpm, 5 min), the supernatant was removed  
79 and the cells were washed with PBS twice. Then the amount of cells was counted, and  
80 0.5 mL of cell dispersion was put into PTFE digestion vessels. After adding 2.0 mL of  
81  $\text{HNO}_3$ , the vessels were put on an electric hot plate (120  $^{\circ}\text{C}$ ) for 2 h and maintained at  
82 80  $^{\circ}\text{C}$ . When the samples were nearly dryness, the digest was transferred and diluted  
83 with 5%  $\text{HNO}_3$  to 1.0 mL. The obtained solution was subjected to ICP-MS  
84 measurement directly.

85

#### 86 **Optimization of microextraction conditions**

87 Sample flow rate influences the retention of target metals on the magnetic solid phase  
88 packed-column. To optimize the sample flow rate, 0.5 mL of sample solution was  
89 passed through the microextraction channels with the flow rates ranging from 4 to 25  
90  $\mu\text{L min}^{-1}$ . The experimental results in Fig. S5 indicate that quantitative adsorption can  
91 be obtained for Cu, Zn, Cd, Hg, Pb and Bi with a sample flow rate less than 8  $\mu\text{L min}^{-1}$ .  
92 Thus, a flow rate of 8  $\mu\text{L min}^{-1}$  was used in subsequent experiments.

93 To study the effect of the sample volume on the adsorption efficiency of target metals,  
94 various sample solution (volume of 0.1-2.0 mL) containing Cu, Zn, Cd, Hg, Pb and Bi  
95 each at 6 ng were passed through the microextraction channels on chip at a flow rate  
96 of 8  $\mu\text{L min}^{-1}$  and the adsorption efficiencies were determined. As can be seen in Fig.  
97 S6, a quantitative adsorption can be obtained for Cu, Zn, Cd, Hg, Pb and Bi with the  
98 sample volume ranging from 0.1 to 2.0 mL. In consideration of the enrichment factor,

99 sample throughput and available amount of cell samples, a sample volume of 0.5 mL  
100 was selected in subsequent experiments.

101 As shown in Fig. 2, the adsorption of the target metals on  $\text{Fe}_3\text{O}_4@\text{SiO}_2@\text{APTES}$  is  
102 decreased rapidly with decreasing the sample pH when the pH is lower than 6,  
103 therefore, acid was chosen to elute the retained metals from the  
104  $\text{Fe}_3\text{O}_4@\text{SiO}_2@\text{APTES}$ . However, the preliminary studies indicate that the adsorption  
105 of Hg and Bi is so strong that it is difficult to elute them quantitatively even by using  
106 strong acid alone. To overcome this problem, a mixed solution of  $\text{HNO}_3$  and thiourea  
107 was studied as the eluent. By fixing the  $\text{HNO}_3$  concentration at  $1.5 \text{ mol L}^{-1}$ , the effect  
108 of thiourea concentration in the range of 0-4 % (m/v) on the elution of target metal  
109 was investigated. As shown in Fig. S7, thiourea with a concentration of higher than 2  
110 % presents a quantitative recovery for Hg and Bi, whereas no obvious effect of  
111 thiourea on the elution of Cu, Zn, Cd and Pb is observed in the tested concentration  
112 range. At last, the concentration of thiourea was selected as 2% (m/v).

113 Then the effect of  $\text{HNO}_3$  concentration on the elution of target metals was studied by  
114 fixing the concentration of thiourea at 2% (m/v) and the results are shown in Fig. S8.  
115 As can be seen, Cu, Zn, Cd, Hg, Pb and Bi can be eluted quantitatively in the  $\text{HNO}_3$   
116 concentration range of 0.2-1.5  $\text{mol L}^{-1}$ . Consequently, 0.5  $\text{mol L}^{-1}$   $\text{HNO}_3$  containing  
117 2% (m/v) thiourea was selected as the eluent in further experiments.

118 The effect of eluent flow rate in the range of 3-10  $\mu\text{L min}^{-1}$  on the desorption  
119 efficiency of target metals was examined by online ICP-MS detection mode. The  
120 experimental results show that no obvious influence of the eluent flow rate on the  
121 desorption efficiency of Cu, Zn, Cd, Hg, Pb and Bi was observed in the eluent flow  
122 rate range of 3-6  $\mu\text{L min}^{-1}$ . Subsequently, 5  $\mu\text{L min}^{-1}$  was selected as the eluent flow  
123 rate.

124 By keeping the eluent flow rate of 5  $\mu\text{L min}^{-1}$ , the effect of eluent volume on the  
125 desorption of target metals from microchannels was studied with eluent volume  
126 varying in the range of 3-35  $\mu\text{L}$ . It was found that 7  $\mu\text{L}$  eluent was enough for a

quantitative desorption of all the analytes. Therefore, the eluent volume of 7  $\mu\text{L}$  was selected for further experiments.

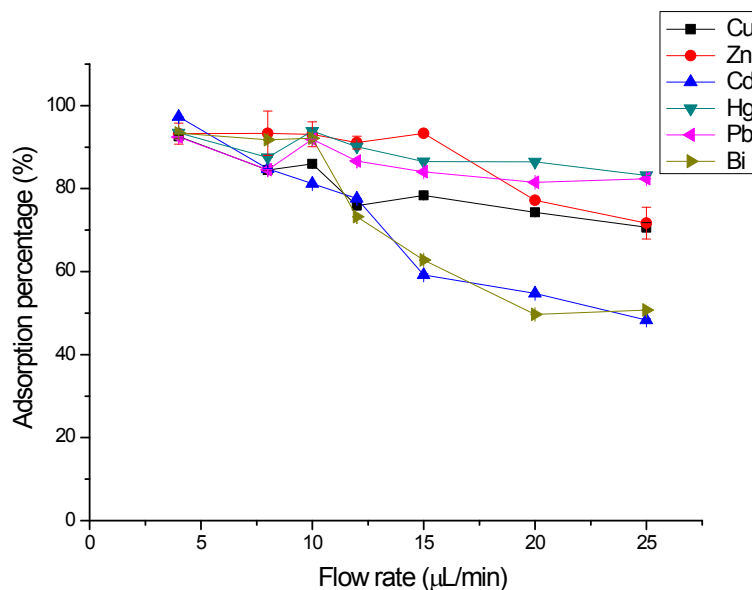

**Fig. S1** Effect of flow rate on the extraction of Cu, Zn, Cd, Hg, Pb and Bi. ( $C_{\text{Cu, Zn, Cd, Hg, Pb, Bi}} = 10 \mu\text{g L}^{-1}$ ; sample volume: 0.5 mL)

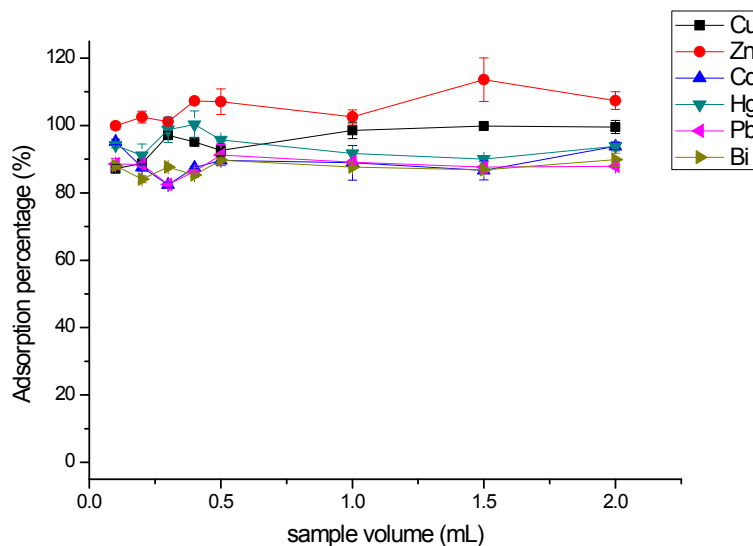

**Fig. S2** Effect of sample volume on the extraction of Cu, Zn, Cd, Hg, Pb and Bi. (sample flow rate:  $8 \mu\text{L min}^{-1}$ )

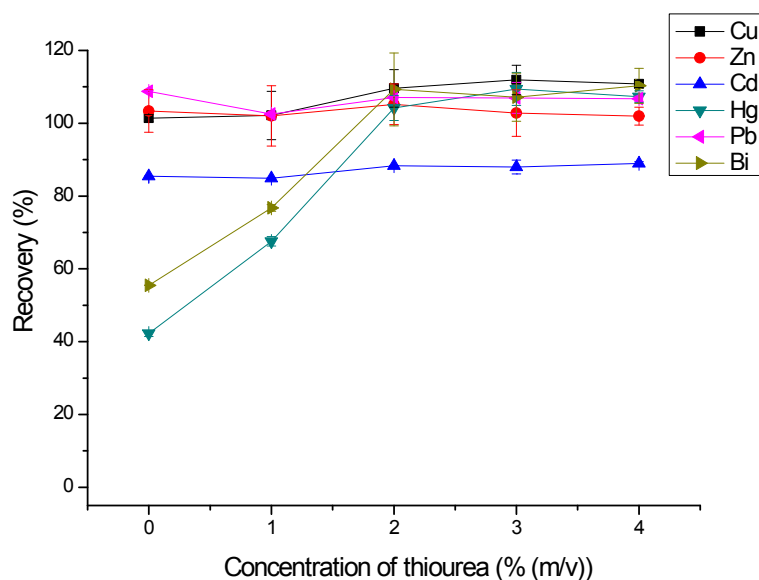

137

138 **Fig. S3** Effect of concentration of thiourea on the recovery of Cu, Zn, Cd, Hg, Pb and  
 139 Bi. ( $C_{\text{Cu, Zn, Cd, Hg, Pb, Bi}} = 10 \mu\text{g L}^{-1}$ ; sample flow rate:  $8 \mu\text{L min}^{-1}$ ; sample volume: 0.5  
 140 mL;  $1.5 \text{ mol L}^{-1} \text{HNO}_3$  in the eluent; eluent flow rate:  $3 \mu\text{L min}^{-1}$ ; eluent volume: 0.1  
 141 mL)

142

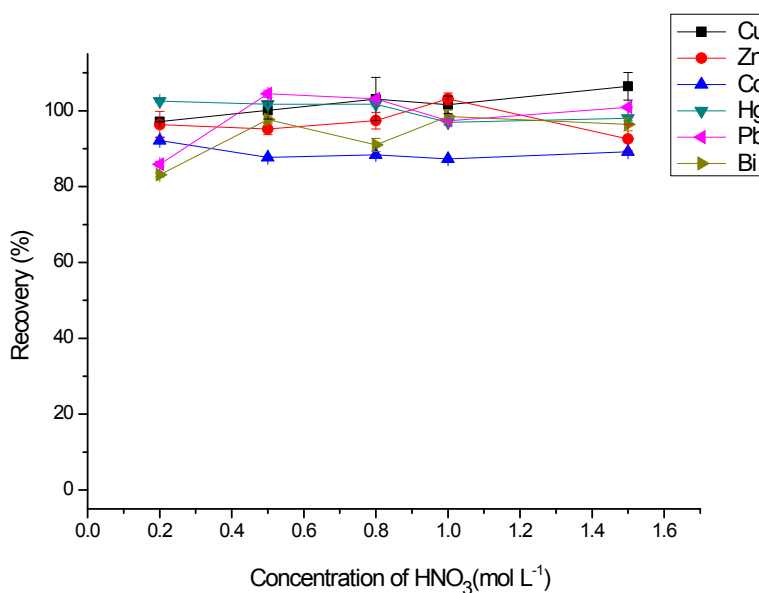

143

144 **Fig. S4** Effect of concentration of  $\text{HNO}_3$  on the recovery of Cu, Zn, Cd, Hg, Pb and  
 145 Bi. ( $C_{\text{Cu, Zn, Cd, Hg, Pb, Bi}} = 10 \mu\text{g L}^{-1}$ ; sample flow rate:  $8 \mu\text{L min}^{-1}$ ; sample volume: 0.5  
 146 mL; 2% thiourea in the eluent; eluent flow rate:  $3 \mu\text{L min}^{-1}$ ; eluent volume: 0.1 mL )

147

148

149

150

151

152

153

154

155

156

157

158

159

160

161

162

163

164

165

166

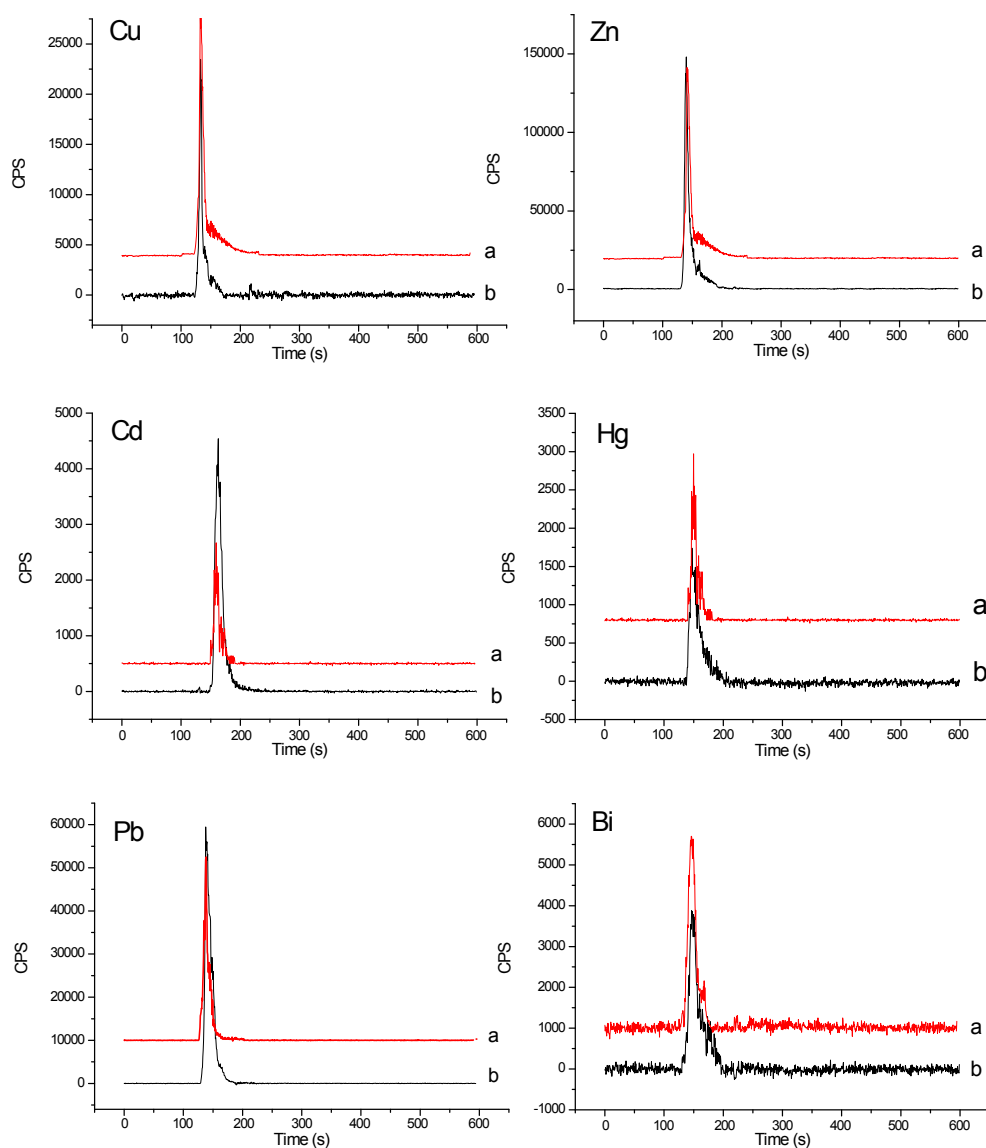

167 **Fig. S5** HPLC-ICP-MS chromatograms for the eluent from the chip-based MSPME of  
168 cell lysis solution (a) and the mixed standard solution of target metal ions prepared in  
169 0.5 mol L<sup>-1</sup> HNO<sub>3</sub> containing 2% thiourea (elution solution) (b).

170

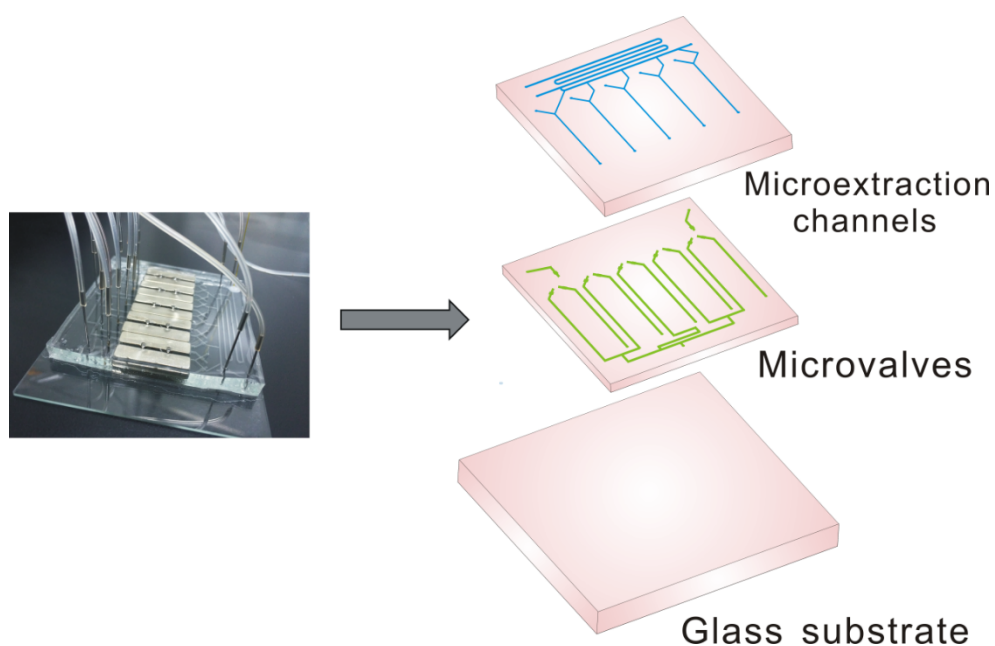

171

172 **Fig. S6** The schematic layout of the fabricated chip layer by layer.

173

174 **Table S1 Tolerance folds of coexisting ions to the target elements (c=10  $\mu\text{g L}^{-1}$ )**

| Coexisting ions    | Tolerance concentration ( $\mu\text{g mL}^{-1}$ ) |
|--------------------|---------------------------------------------------|
| $\text{K}^+$       | 5000                                              |
| $\text{Na}^+$      | 5000                                              |
| $\text{Ca}^{2+}$   | 2000                                              |
| $\text{Mg}^{2+}$   | 2000                                              |
| $\text{Fe}^{3+}$   | 5                                                 |
| $\text{Al}^{3+}$   | 5                                                 |
| $\text{Cl}^-$      | 5000                                              |
| $\text{NO}_3^-$    | 5000                                              |
| $\text{SO}_4^{2-}$ | 2000                                              |
| $\text{HCO}_3^-$   | 5000                                              |
| $\text{PO}_4^{3-}$ | 5000                                              |

175 Note: The tolerance to the co-existing ions was evaluated in the presence of all tested ions.

176

177

178

179

**Table S2 Processes of chip-based MSPME**

| Microvalve (open) | Process              | Solution            |
|-------------------|----------------------|---------------------|
| B1                | Sample introduction  | Sample solution     |
| B2                | Elution of channel 1 | Eluent              |
| B7                | Wash the channel     | 5%(v/v) nitric acid |
| B8                | Separate the liquid  | N <sub>2</sub>      |
| B3                | Elution of channel 2 | Eluent              |
| B7                | Wash the channel     | 5%(v/v) nitric acid |
| B8                | Separate the liquid  | N <sub>2</sub>      |
| B4                | Elution of channel 3 | Eluent              |
| B7                | Wash the channel     | 5%(v/v) nitric acid |
| B8                | Separate the liquid  | N <sub>2</sub>      |
| B5                | Elution of channel 4 | Eluent              |
| B7                | Wash the channel     | 5%(v/v) nitric acid |
| B8                | Separate the liquid  | N <sub>2</sub>      |
| B6                | Elution of channel 5 | Eluent              |
| B7                | Wash the channel     | 5%(v/v) nitric acid |
| B8                | Separate the liquid  | N <sub>2</sub>      |

180 Note: The eluent was 0.5 mol L<sup>-1</sup> HNO<sub>3</sub> containing 2% thiourea

181
